# Supplementary material for: Novel oncogene COPS3 interacts with Beclin1 and Raf-1 to regulate metastasis of osteosarcoma through autophagy
Source: Springer Nature journal article supplement (doi:10.1186/s13046-018-0791-6), 2018-07-03

**a**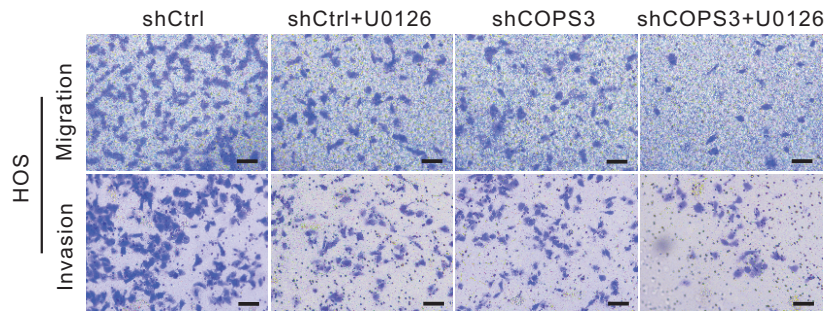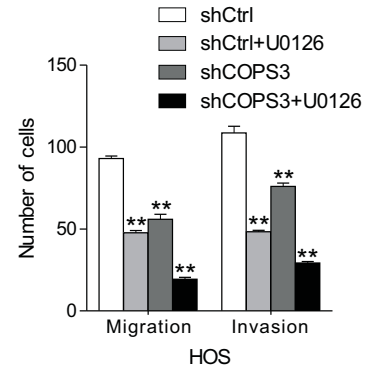**b**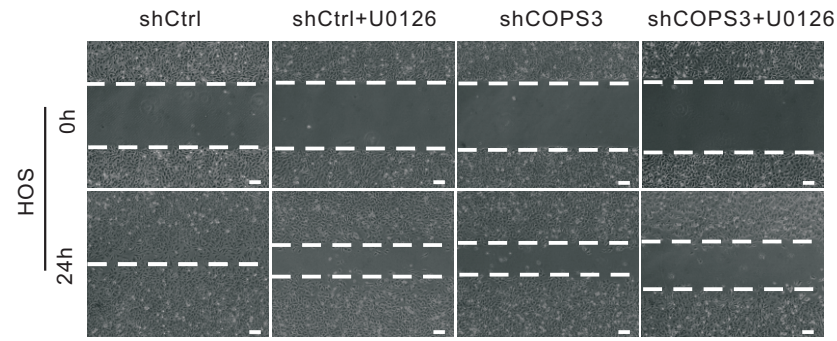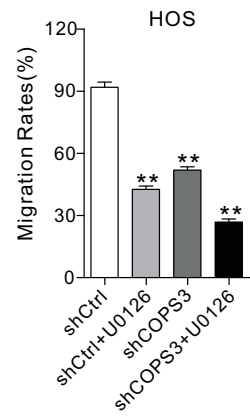**c**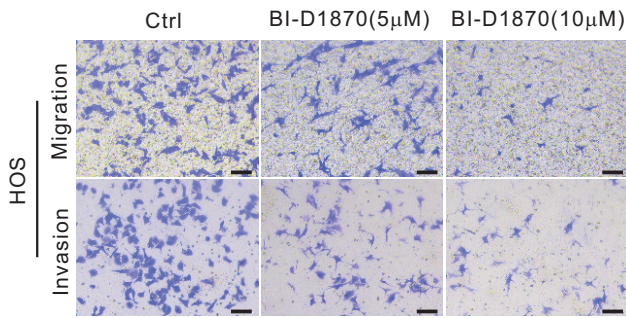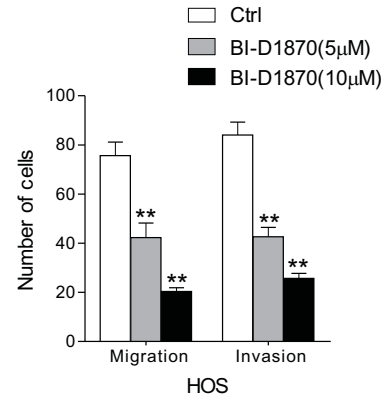**d**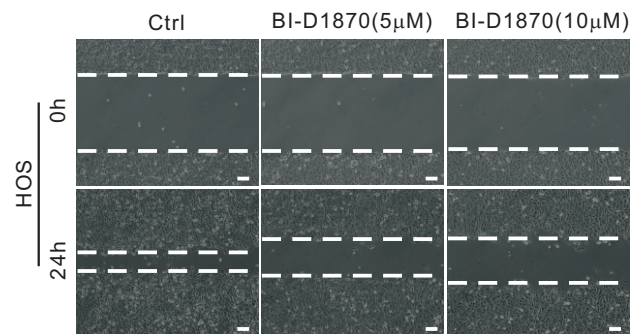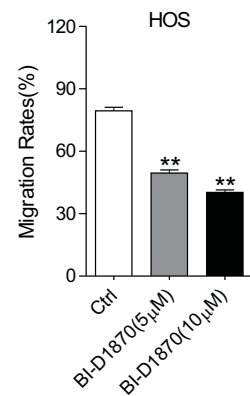

Supplement: MOESM1 [file 15904412]
